# Supplementary material for: 2-Methoxyestradiol Inhibits Radiation-Induced Skin Injuries
Source: MDPI journal article supplement (doi:10.3390/ijms23084171), 2022-04-10
Supplement: s1 [file s1]

# Supplementary Figure S1

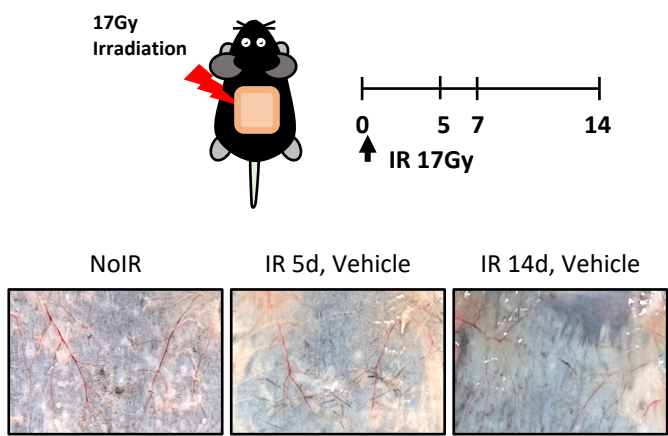

**Supplementary Figure S1. Representative images of radiation-induced vascular damage.** C57BL/6 mice skin were irradiated with 17 Gy using a 4-cm field. Representative images of 5 days and 2 weeks after irradiation of skin vessels.

# Supplementary Figure S2

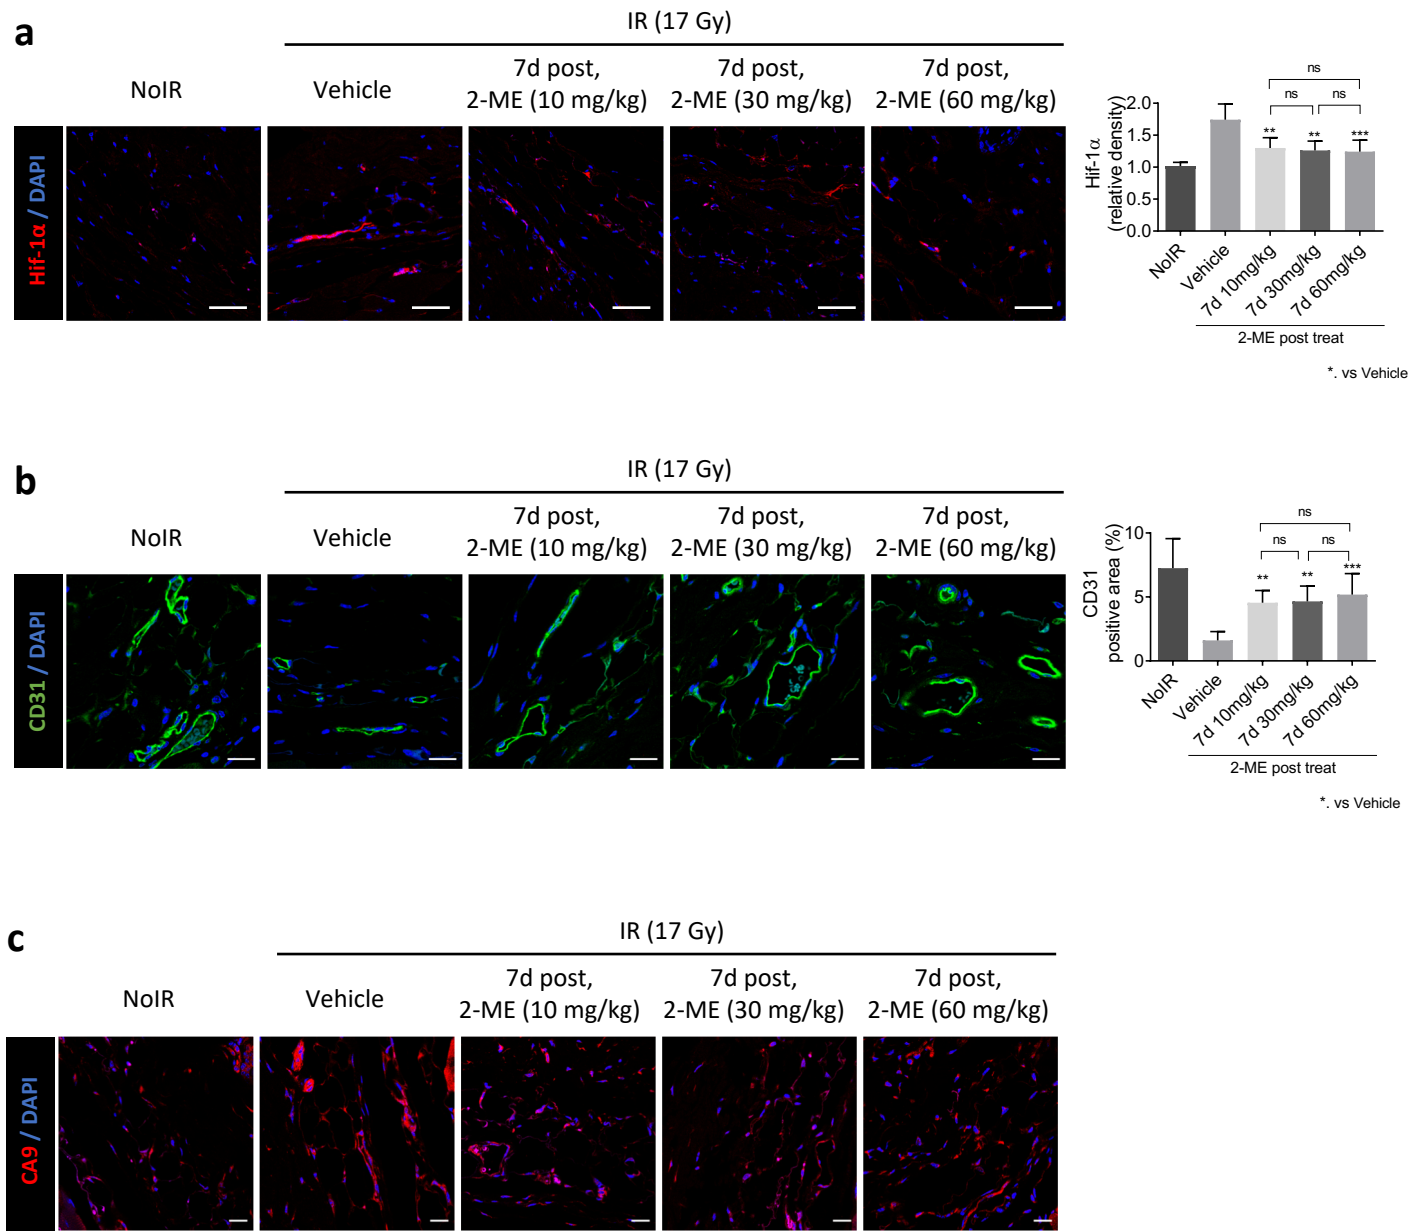

**Supplementary Figure S2. 2-ME inhibits irradiation-induced skin vascular CD31, HIF-1α expression, and CA9 expression.** C57BL/6 mice skin were irradiated with 17 Gy using a 4-cm field. Mice were orally injected with 2-ME (30 mg/kg) 7 days after irradiation for a total of six times in 3 weeks. (a) Immunofluorescence staining of HIF-1a (Red) in skin tissues from mice that were non-irradiated and irradiated with or without 2-ME treatment. Scale bar=50 μm. Quantification of the HIF-1α<sup>+</sup> relative density as an average of five fields (magnification, 200×, n > 5). (b) Immunofluorescence staining of CD31 (green) in skin tissues from mice that were non-irradiated and irradiated with or without 2-ME treatment. Scale bar=20 μm. Quantification of the CD31<sup>+</sup> area as an average of five fields (magnification, 200×, n > 5). (c) Immunofluorescence staining of CA9 (Red) in skin tissues from mice that were non-irradiated and irradiated with or without 2-ME treatment. Scale bar=20 μm. Quantification of the CA9<sup>+</sup> area per field as an average of five fields (magnification, 200×, n > 5). For all graphs, error bars indicate the SD from n>3 biologically independent experiments (one-way ANOVA for multiple comparisons). \*  $p < 0.05$ , \*\*  $p < 0.01$ , \*\*\*  $p < 0.001$ , and \*\*\*\*  $p < 0.0001$ .

# Supplementary Figure S3

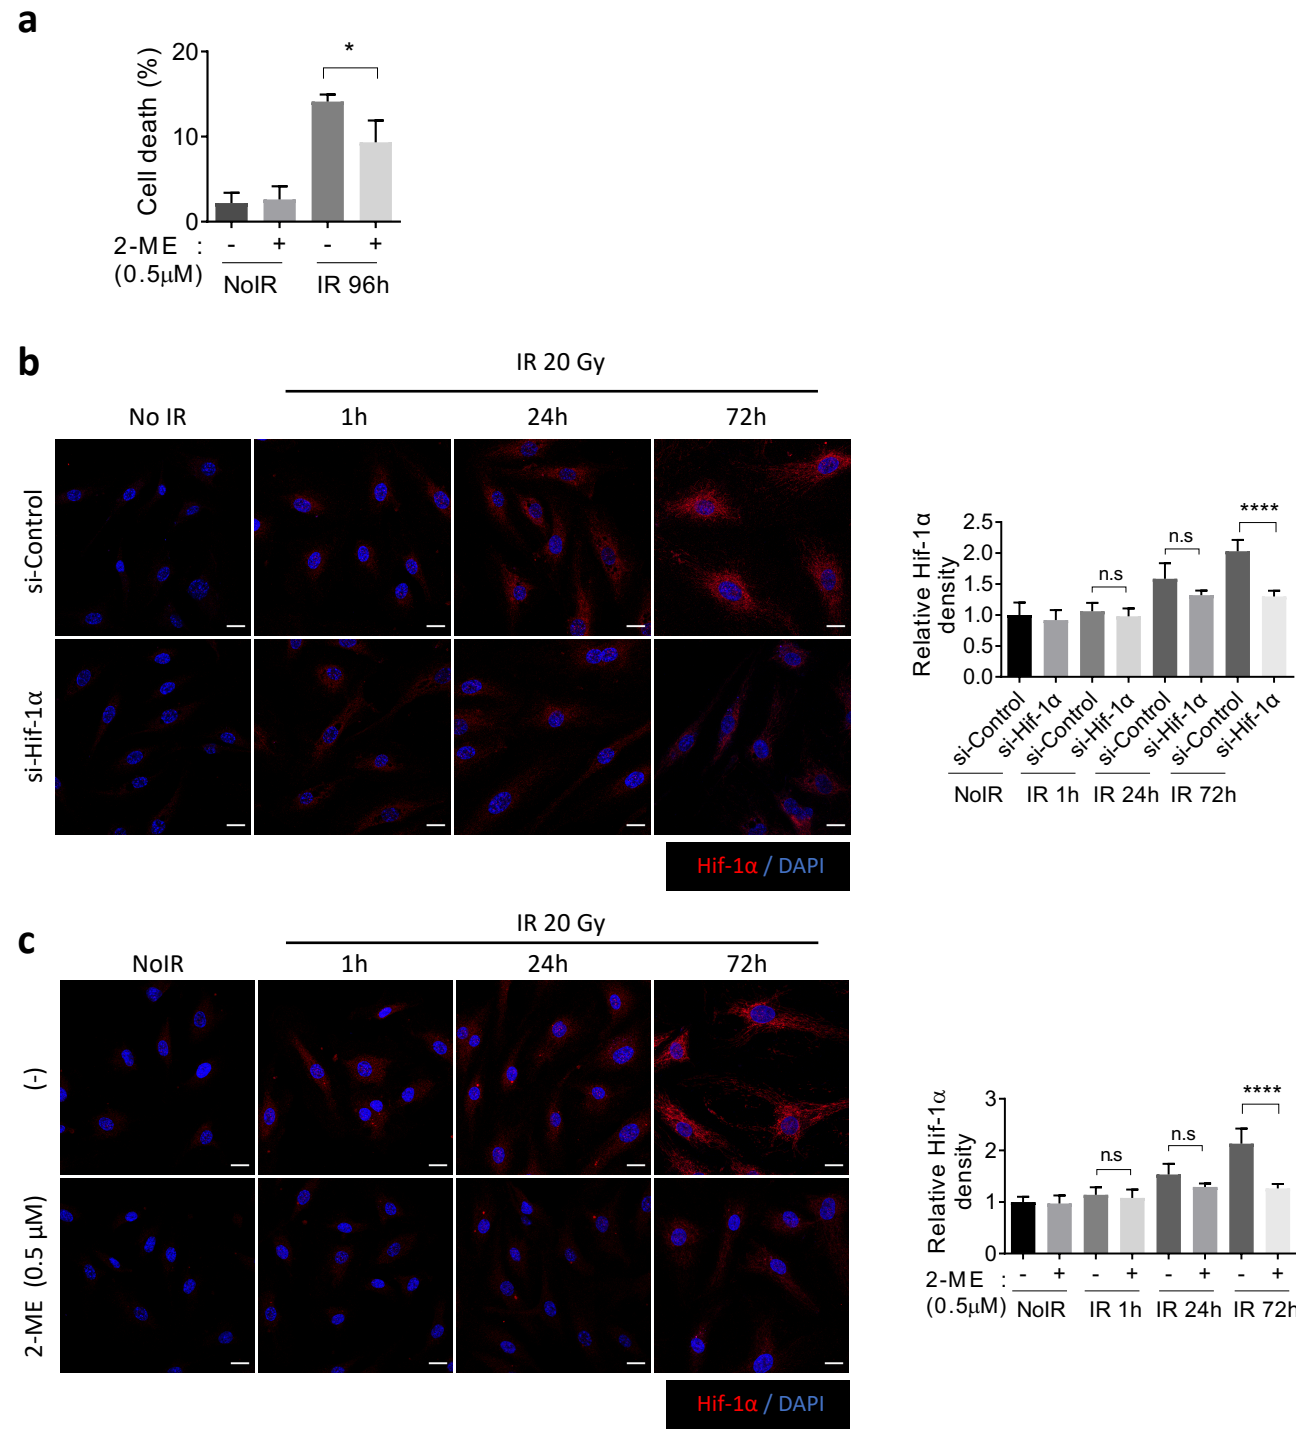

**Supplementary Figure S3. 2-ME inhibits radiation-induced cell death and upregulated expression of HIF-1a in HDMECs.** (a) The cell death rate in HDMECs 96 h after irradiation and non-irradiation with or without 2-ME (0.5µM) pretreatment determined via FACS analysis using PI staining (n=4 independent experiments). (b) Immunofluorescence staining of HIF-1a in HDMECs transfected with HIF-1a siRNA and control siRNA. Transfected HDMECs were irradiated with 20 Gy and harvested at 1 h, 24 h, and 72 h. Scale bar=20 µm. Bar graph indicates relative density of HIF-1a from five fields (magnification, 200 ×, n=4 independent experiments) and error bars represent mean ± SD (one-way ANOVA for multiple comparisons). (c) Immunofluorescence staining of HIF-1a in HDMECs treated with 2-ME (0.5 µM) before being irradiated with 20 Gy. The cells were harvested at 1 h, 24 h, and 72 h. Scale bar=20 µm. Bar graph indicates relative density of HIF-1a from five fields (magnification, 200 ×, n=4 independent experiments) and error bars represent mean ± SD (one-way ANOVA for multiple comparisons). \* p < 0.05, \*\* p < 0.01, \*\*\* p < 0.001 and \*\*\*\* p < 0.0001.

Supplementary Figure S4

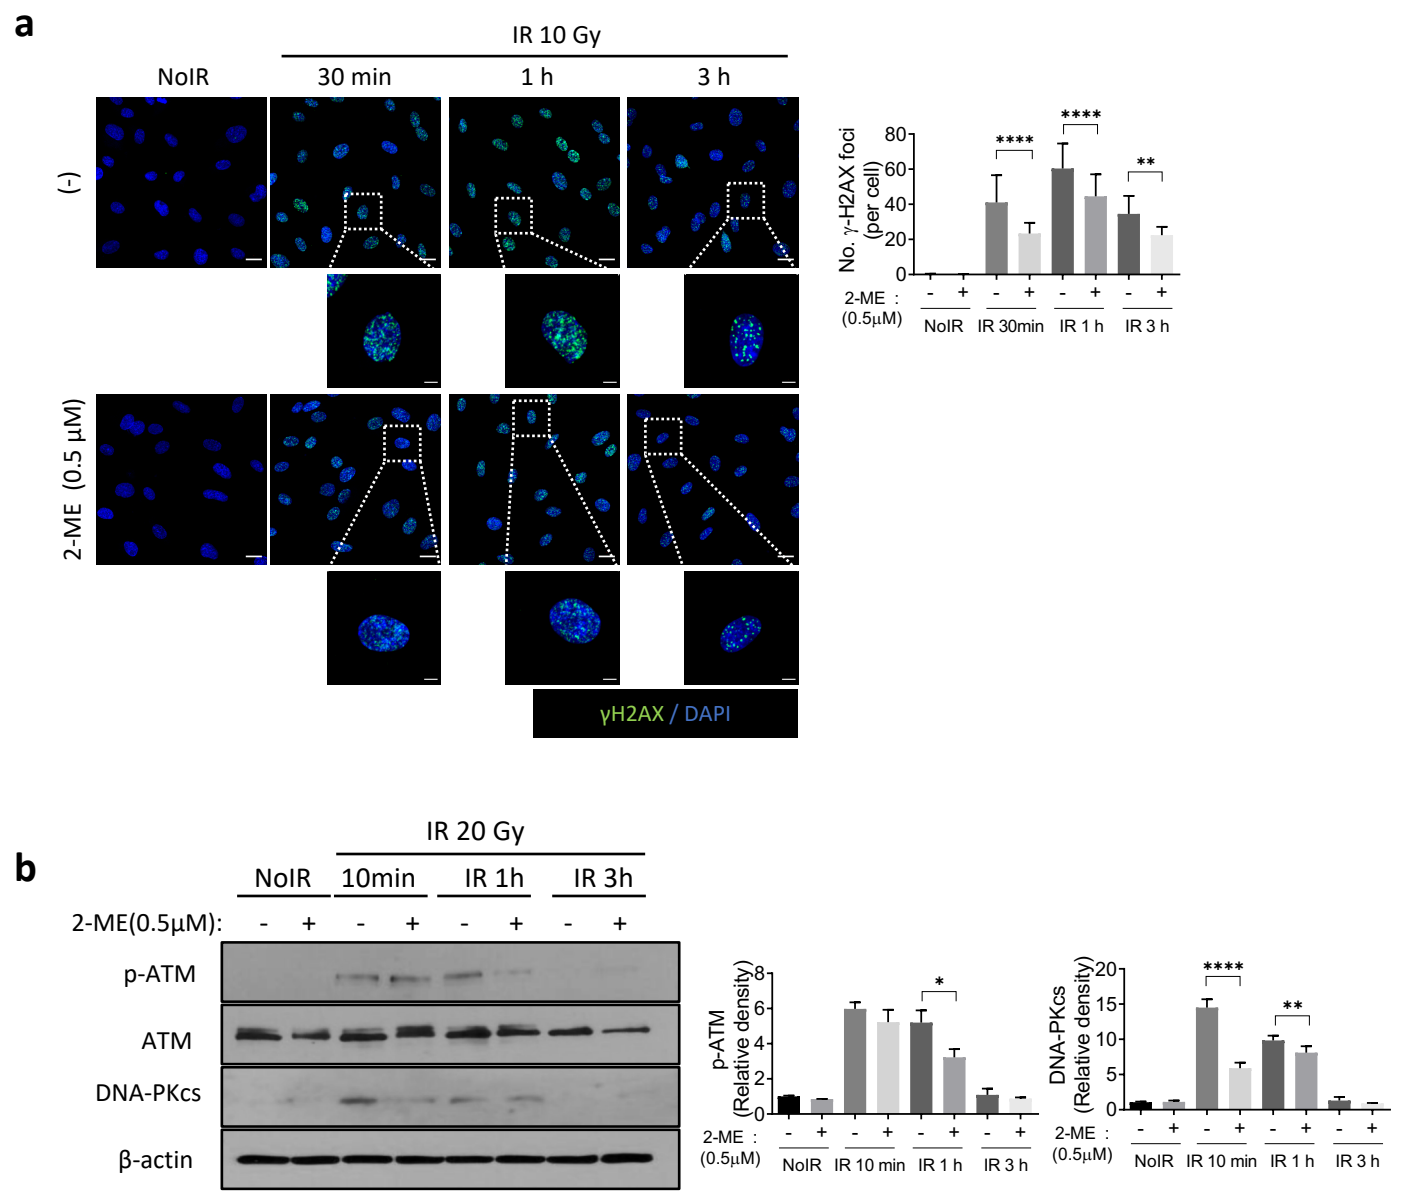

**Supplementary Figure S4. 2-ME inhibits radiation-induced DNA damage in HUVECs and protein expression in HDMECs.** (a) Immunofluorescence staining  $\gamma$ -H2AX in HUVECs treated with 2-ME (0.5  $\mu$ M) before 30 min irradiated with 10 Gy. The cells were harvested at 30 min, 1 hr, and 3 hr. Scale bar=20  $\mu$ m; scale bar of the cropped images=5  $\mu$ m. Bar graphs indicate the number of  $\gamma$ -H2AX foci per cell. The average numbers of foci/cell were each determined from five fields (magnification, 200  $\times$ ). (b) HDMECs were irradiated with 20 Gy after treated with 2-ME (0.5  $\mu$ M) and harvest at 10 min, 1 hr, and 3hr. DNA damage repair protein level, p-ATM, ATM, DNA-PKcs, and  $\beta$ -actin were assessed by Western blotting. For all graphs, error bars indicate the SD from  $n>3$  biologically independent experiments (one-way ANOVA for multiple comparisons). \*  $p < 0.05$ , \*\*  $p < 0.01$ , \*\*\*  $p < 0.001$ , and \*\*\*\*  $p < 0.0001$ .
